# Supplementary material for: A supramolecular strategy for the control of thermal expansion in molecular crystals
Source: Royal Society of Chemistry journal article supplement (doi:10.1039/d5tc03242c), 2026-01-01
Supplement: d5tc03242c1.pdf [file d5tc03242c1.pdf]

## Supporting Information

A supramolecular strategy for the control of thermal expansion in molecular crystals

Masato Haneda, Kiyonori Takahashi,\* Naohiro Hasuo, Rui-Kang Huang, Chen Xue, Jia-bing Wu, Shin-ichiro Noro, Seiji Tsuzuki, Sadafumi Nishihara and Takayoshi Nakamura\*

E-mail: [ktakahashi@kumamoto-u.ac.jp](mailto:ktakahashi@kumamoto-u.ac.jp) (K.Takahashi), [tnakam@hiroshima-u.ac.jp](mailto:tnakam@hiroshima-u.ac.jp) (T.Nakamura)

**General.** All reagents purchased were used without further purification. Elemental analyses were carried out by using a CHN analyzer (CE440, Exeter Analytical, Inc.) at Global Facility Center, Hokkaido University.

**Synthesis.** Precursor of  $(\text{TBA}^+)[\text{Ni}(\text{dmit})_2]^-$  ( $\text{TBA}^+$  = tetra-*n*-butylammonium<sup>+</sup>) and  $((^+\text{H}_3\text{N}-\text{C}_2\text{H}_4)_2\text{O})(\text{BF}_4^-)_2$  were prepared using a procedure reported in the literature.<sup>28,50</sup> A solution of  $(\text{TBA}^+)[\text{Ni}(\text{dmit})_2]^-$  (20 mg, 0.04 mmol) in  $\text{CH}_3\text{CN}$  (20 mL) was added to a solution of benzo[18]crown-6 (128 mg, 0.35 mmol) and  $((^+\text{H}_3\text{N}-\text{C}_2\text{H}_4)_2\text{O})(\text{BF}_4^-)_2$  (37 mg, 0.13 mmol) in  $\text{CH}_3\text{CN}$  (19 mL) and  $\text{CH}_3\text{OH}$  (1 mL). Crystal **1** was obtained by slow diffusion over a period of 4 days. Elemental analysis for crystal **1**: calcd. for  $\text{C}_{48}\text{H}_{62}\text{N}_2\text{Ni}_2\text{O}_{13}\text{S}_{20}$ : C: 33.31%, H: 4.00%, N: 1.77%, Found: C: 35.15%, H: 3.73%, N: 1.71%.

**Crystal structure determination.** Temperature-dependent structural analysis of the single crystal **1** was performed using a Rigaku XtaLAB-Synergy diffractometer with a HyPix-6000 area detector and multilayer mirror-monochromated Mo  $\text{K}\alpha$  radiation ( $\lambda = 0.71073 \text{ \AA}$ ). A single crystal was mounted on a MicroMounts<sup>TM</sup> tip (MiTeGen) with Paratone 8277 (Hampton Research). The temperature dependence was measured using the same crystal. For the reflection data, multi-scan absorption corrections were applied to the crystals. Data collection was performed and processed using the CrysAlisPRO interface (Oxford Diffraction, Agilent Technologies UK Ltd). The initial structure was solved using SHELXT,<sup>51</sup> and structural refinement was performed using OLEX2 software.<sup>52</sup> Anisotropic refinement was applied to all atoms, except for the hydrogen atoms. CCDC 2444930-2444943 for crystal **1** at 110-320 K, respectively). The CLTE was calculated using the *PASCaI* web program based on the unit cell parameters at each temperature.<sup>29</sup>

**Physical Property Measurements.** Differential scanning calorimetry (DSC) measurements were carried out using a Q2000 differential scanning calorimeter (TA Instruments) in the temperature range from 240 to 300 K at a scanning rate of  $5 \text{ K min}^{-1}$  under a flow of  $\text{N}_2$  gas ( $50 \text{ mL min}^{-1}$ ). The temperature-dependent  $\chi_m$  for polycrystalline sample of **1** was measured using a Quantum Design MPMS-3 SQUID magnetometer. Prior to sample measurement, the magnetic susceptibility of the sample holder (aluminum wrap) was measured under identical conditions, then the susceptibility of the holder was subtracted from the gram susceptibility as the paramagnetic contribution. The diamagnetic component in the sample was subtracted based on Pascal's constant,  $-4.2465 \times 10^{-4} \text{ cm}^3 \text{ mol}^{-1}$ .<sup>53</sup> A magnetic field of 1 T was applied for all temperature-dependent measurements. Molecular weight of  $816.805 \text{ g mol}^{-1}$  (the  $\chi_m$  for two  $[\text{Ni}(\text{dmit})_2]^-$  molecules) was used for calculation of  $\chi_m$  of crystal **1**. Temperature- and frequency-

dependence of dielectric constant was measured using an impedance analyzer 4294A (Agilent) with the four-probe AC impedance method at a frequency range of  $10^{2.5}$ – $10^6$  Hz. The temperature was controlled using cryostats with temperature controller models 331 (Lake Shore Cryotronics Inc.). Electrical contacts were prepared using a silver paste (D-500, Fujikura Kasei Co., Ltd.) to attach the 25  $\mu\text{m}$   $\phi$  gold wires to the pelletized sample.

**Theoretical calculation.** The extended Hückel molecular orbital method within the tight-binding approximation was applied to calculate the transfer integral ( $t$ ) data between the  $[\text{Ni}(\text{dmit})_2]^-$  anions in crystal **1**. The lowest unoccupied molecular orbital of the  $[\text{Ni}(\text{dmit})_2]^-$  molecule was used as the basis function. According to the literature, semiempirical parameters for Slater-type atomic orbitals were obtained. The  $t$  values between each pair of molecules were assumed to be proportional to the overlap integral ( $S$ ) according to the equation  $t = -10S$  (eV).<sup>47</sup> The intermolecular interactions between **CE1**...**CE1** and **CEA1**...**CEA1** were estimated from computations at the B3LYP/6-31G(d,p) level.<sup>54</sup> Grimme's D3 dispersion model was used for dispersion correction.<sup>42</sup> Computations were performed using the GAUSSIAN16 code set.<sup>55</sup> To remove errors due to the overestimation of interaction energy (basis set superposition error), the counterpoise correction implemented in GAUSSIAN16 was applied.<sup>56</sup> The geometric parameters of in the calculation were used based on the hydrogen atom positions modeled in X-ray crystal structure analysis.<sup>49,51</sup>

**§Table S1.** Representative zero thermal expansion crystals of organic and inorganic crystals.

| Materials Name                                                                                                                                                        | CLTE ( $\alpha$ , $\times 10^{-6}$ K $^{-1}$ ) | References |
|-----------------------------------------------------------------------------------------------------------------------------------------------------------------------|------------------------------------------------|------------|
| $((^+\text{H}_3\text{N}-\text{C}_2\text{H}_4)_2\text{O})(\text{B}[\text{18}]\text{crown-6})_2([\text{Ni}(\text{dmit})_2]^-)_2$                                        | -0.99 (110-190 K)                              | This study |
| IMD-OXA                                                                                                                                                               | +0.30 (100-400 K)                              | [8]        |
| Al-TCPP-Ni                                                                                                                                                            | +0.31 (125-475 K)                              | [39]       |
| $\text{Eu}_2(\text{ox})(\text{glc})_4$                                                                                                                                | +1.74 (105-250 K)                              | [42]       |
| Zn-DMOF-TM x                                                                                                                                                          | -10 (~288 K)                                   | [43]       |
| (3-chloro-adamantane-1-ammonium)([18]crown-6)( $\text{ClO}_4^-$ )                                                                                                     | -3.1 (250-317 K)                               | [27]       |
| $\text{Zn}_4\text{O}(\text{CO}_2)_6$                                                                                                                                  | -0.14 (300-600 K)                              | [44]       |
| $\text{Fe}_{2.5}\text{Hf}$                                                                                                                                            | +0.40 (433-583 K)                              | [57]       |
| $\text{Ho}_x\text{Fe}_{1-x}$ ( $x = 0.04$ )                                                                                                                           | +0.19 (100~335 K)                              | [58]       |
| glass ceramics                                                                                                                                                        | +1.0 (273-323 K)                               | [36]       |
| $\text{LaFe}_{11.0}\text{Si}_{2.0}$                                                                                                                                   | +0.50 (20-275 K)                               | [59]       |
| $\text{TbCo}_{1.9}\text{Fe}_{0.1}$ (Rare-Earth-Based Alloy)                                                                                                           | +0.48 (123-307 K)                              | [60]       |
| $(1-x)\text{PbTiO}_3-x\text{Bi}(\text{Ni}_{1/2}\text{Ti}_{1/2})\text{O}_3$ ( $x = 0.2$ )                                                                              | +0.38 (25-525 K)                               | [61]       |
| $(\text{Zr}, \text{Nb})\text{Fe}_2$                                                                                                                                   | +0.47 (4-425 K)                                | [62]       |
| $\text{NaZn}_{13}$ -type $\text{La}(\text{Fe}, \text{Si})_{13}$                                                                                                       | < +1.0 (15-150 K)                              | [63]       |
| $\text{K}_6\text{Cd}_3(\text{C}_3\text{N}_3\text{O}_3)_4$                                                                                                             | 0.06 (10-130 K)                                | [64]       |
| $\text{Cs}^{\text{I}}_{0.94}\text{Mn}^{\text{II}}[\text{Fe}^{\text{II}}(\text{CN})_6]_{0.21}[\text{Fe}^{\text{III}}(\text{CN})_6]_{0.70} \cdot 0.8\text{H}_2\text{O}$ | +0.20 (20-300 K)                               | [65]       |
| $\text{PbC}_4\text{O}_4$                                                                                                                                              | -0.61 (125-500 K)                              | [66]       |

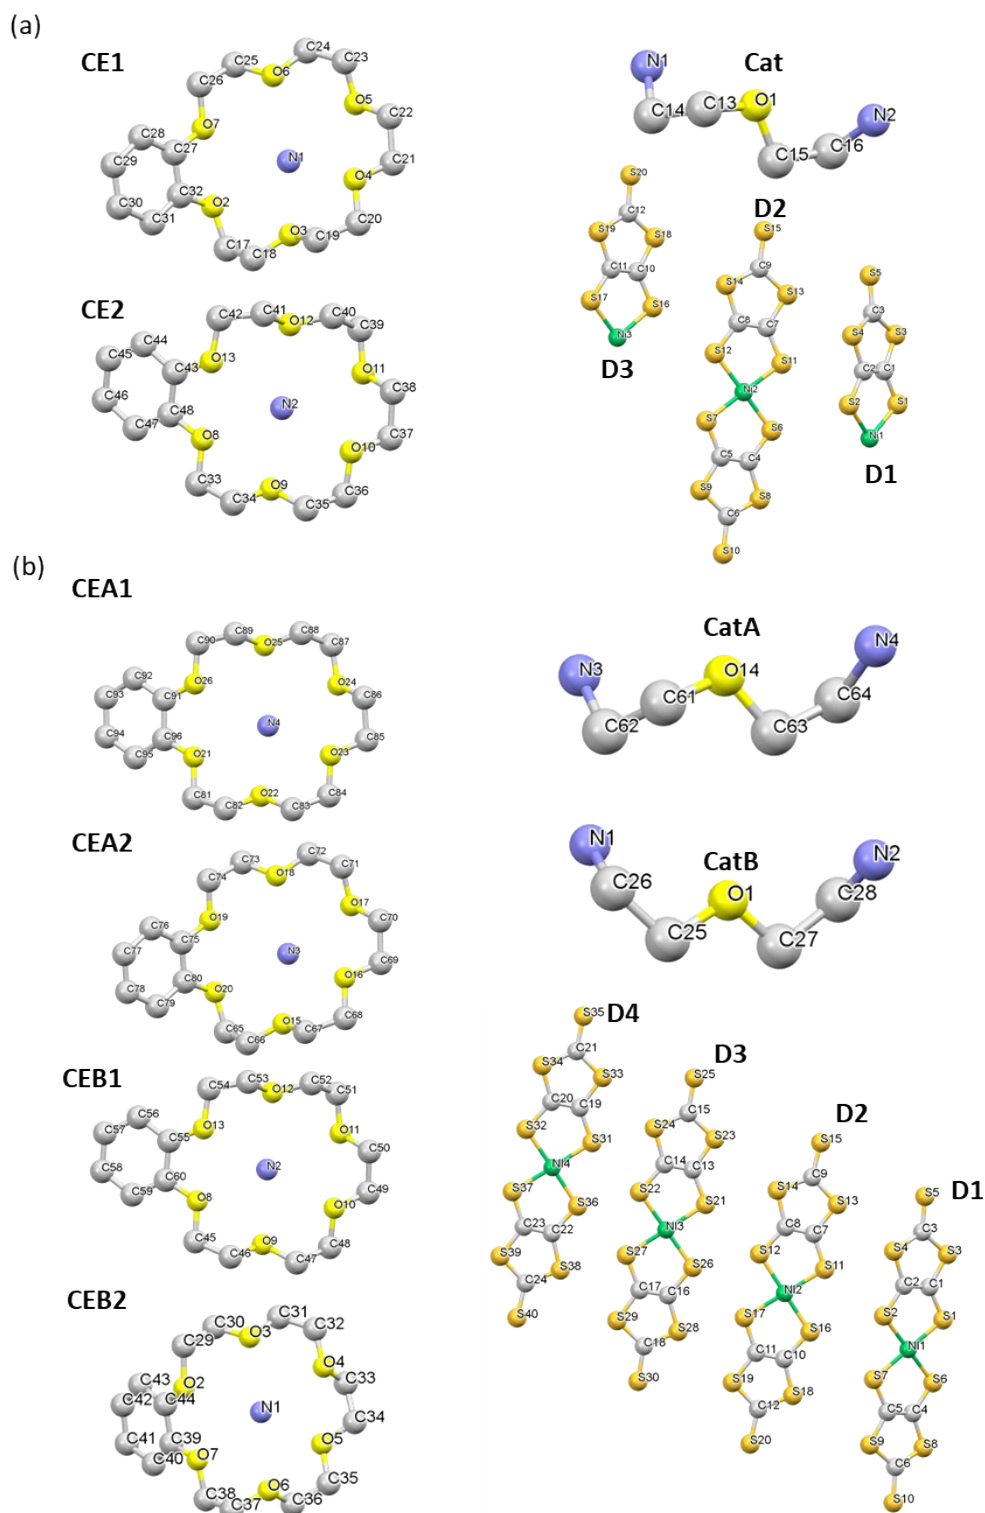

**§Figure S1.** Crystallographically independent structures of crystal **1** at 110 K (a) and 270 K (b). The Ni, S, C, N, and O atoms are depicted in green, orange, gray, blue, and yellow, respectively. All molecules are depicted as ellipsoid models. Hydrogen atoms are omitted for clarity.

**§Table S2.** Distances and angles for N-H...O hydrogen bonding at 110 and 270 K

| list of atoms | N...O distance / Å | H...O distance / Å | N-H...O angle / ° |
|---------------|--------------------|--------------------|-------------------|
| 110 K         |                    |                    |                   |
| N1-H1A...O3   | 2.744(2)           | 1.947              | 150.2             |
| N1-H1B...O7   | 3.014(2)           | 2.292              | 136.1             |
| N1-H1C...O5   | 2.927(2)           | 2.189              | 137.7             |
| N2-H2A...O12  | 2.886(2)           | 2.045              | 152.9             |
| N2-H2B...O10  | 2.899(2)           | 2.022              | 161.6             |
| N2-H2C...O8   | 2.924(2)           | 2.035              | 165.4             |
| 270 K         |                    |                    |                   |
| N1-H1A...O3   | 2.808(5)           | 1.966              | 157.2             |
| N1-H1B...O7   | 3.042(5)           | 2.408              | 128.4             |
| N1-H1C...O5   | 2.912(6)           | 2.129              | 146.4             |
| N2-H2A...O8   | 2.940(5)           | 2.090              | 159.6             |
| N2-H2B...O12  | 2.904(5)           | 2.125              | 145.7             |
| N2-H2C...O10  | 2.922(4)           | 2.107              | 151.9             |
| N3-H3A...O15  | 2.790(5)           | 1.987              | 149.3             |
| N3-H3B...O19  | 3.040(5)           | 2.329              | 137.0             |
| N3-H3C...O17  | 2.924(4)           | 2.199              | 138.3             |
| N4-H4A...O22  | 2.853(5)           | 2.197              | 130.2             |
| N4-H4B...O26  | 3.113(4)           | 2.522              | 124.4             |
| N4-H4C...O24  | 2.861(5)           | 2.209              | 129.7             |

**§Table S3.** Distances and angles for C-H...O interactions between crown ethers at 110 and 270 K.

| contacted units    | list of atoms              | C...O distance / Å | H...O distance / Å | C-H...O angle / ° |
|--------------------|----------------------------|--------------------|--------------------|-------------------|
| 110 K              |                            |                    |                    |                   |
| <b>CE1...CE1</b>   | <sup>a</sup> C19-H19B...O4 | 3.631(3)           | 2.708              | 155.3             |
| <b>CE2...CE2</b>   | <sup>a</sup> C35-H35B...O8 | 3.534(2)           | 2.601              | 157.0             |
| 270 K              |                            |                    |                    |                   |
| <b>CEA2...CEA2</b> | C47-H47B...O8              | 3.480(5)           | 2.514              | 173.3             |
| <b>CEB2...CEB2</b> | C83-H83B...O21             | 3.632(5)           | 2.676              | 168.8             |

<sup>a</sup> C-H...O interactions in a complementary manner.

**§Table S4.** Distances and angles for C-H... $\pi$  interactions between crown ethers.

| Temperature / K | contacted units                                                            | list of atoms  | H...C distance / Å | C...C distance / Å | C-H...C angle / ° |
|-----------------|----------------------------------------------------------------------------|----------------|--------------------|--------------------|-------------------|
| 110             | <b>CE1...CE1</b><br><br><br><br><br><br><br><br><br><br><b>CEA1...CEA1</b> | C46-H38B...C38 | 2.753              | 3.461              | 128.90            |
| 130             |                                                                            |                | 2.754              | 3.465              | 129.14            |
| 150             |                                                                            |                | 2.759              | 3.471              | 129.30            |
| 170             |                                                                            |                | 2.767              | 3.480              | 129.38            |
| 190             |                                                                            |                | 2.772              | 3.487              | 129.54            |
| 210             |                                                                            |                | 2.786              | 3.497              | 129.86            |
| 230             |                                                                            |                | 2.799              | 3.507              | 129.70            |
| 250             |                                                                            |                | 2.815              | 3.520              | 129.48            |
| 270             |                                                                            |                | 2.87               | 3.539              | 127               |
| 280             |                                                                            |                | 2.888              | 3.556              | 126.88            |
| 290             |                                                                            |                | 2.911              | 3.57               | 126.19            |
| 300             |                                                                            |                | 2.938              | 3.59               | 125.63            |
| 310             |                                                                            |                | 2.955              | 3.604              | 125.31            |
| 320             |                                                                            |                | 2.987              | 3.622              | 124.21            |

**§Table S5.** Distances and angles for C-H... $\pi$  interactions between crown ethers. The center of gravity of the phenylene ring of benzo[18]crown-6 is indicated as Pc.

| Temperature / K | contacted units                                                            | list of atoms | H...Pc distance / Å | C...Pc distance / Å | C-H...Pc angle / ° |
|-----------------|----------------------------------------------------------------------------|---------------|---------------------|---------------------|--------------------|
| 110             | <b>CE1...CE1</b><br><br><br><br><br><br><br><br><br><br><b>CEA1...CEA1</b> | Pc-H38B...C38 | 3.015               | 3.941               | 156.34             |
| 130             |                                                                            |               | 3.022               | 3.950               | 156.48             |
| 150             |                                                                            |               | 3.031               | 3.959               | 156.36             |
| 170             |                                                                            |               | 3.043               | 3.970               | 156.45             |
| 190             |                                                                            |               | 3.054               | 3.982               | 156.58             |
| 210             |                                                                            |               | 3.074               | 3.993               | 156.62             |
| 230             |                                                                            |               | 3.089               | 4.006               | 156.36             |
| 250             |                                                                            |               | 3.108               | 4.023               | 155.90             |
| 270             |                                                                            |               | 3.126               | 4.016               | 153.33             |
| 280             |                                                                            |               | 3.143               | 4.031               | 152.95             |
| 290             |                                                                            |               | 3.165               | 4.046               | 152.00             |
| 300             |                                                                            |               | 3.188               | 4.064               | 151.22             |
| 310             |                                                                            |               | 3.206               | 4.080               | 150.55             |
| 320             |                                                                            |               | 3.234               | 4.099               | 149.29             |

**§Table S6.** Distance between S...S atoms less than the sum of the van der Waals radii of two S atoms between two [Ni(dmit)<sub>2</sub>] anions at 110 and 270 K

| contacted units | list of atoms | S...S distance / Å |
|-----------------|---------------|--------------------|
| 110 K           |               |                    |
| <b>D1...D1</b>  | S3...S5       | 3.7245(6)          |
| <b>D1...D2</b>  | S2...S6       | 3.5678(6)          |
|                 | S2...S11      | 3.4553(7)          |
|                 | S4...S11      | 3.3281(6)          |
|                 | S4...S13      | 3.3590(7)          |
| <b>D2...D2</b>  | S8...S15      | 3.8010(7)          |
| <b>D2...D3</b>  | S12...S16     | 3.5374(6)          |
|                 | S14...S16     | 3.4441(6)          |
| <b>D3...D3</b>  | S18...S20     | 3.7095(7)          |
| 270 K           |               |                    |
| <b>D1...D2</b>  | S2...S11      | 3.488(1)           |
|                 | S2...S16      | 3.511(1)           |
|                 | S4...S11      | 3.349(1)           |
|                 | S4...S13      | 3.435(1)           |
| <b>D1...D4</b>  | S1...S32      | 3.599(1)           |
|                 | S6...S32      | 3.576(1)           |
|                 | S6...S37      | 3.480(1)           |
|                 | S8...S37      | 3.428(1)           |
|                 | S8...S39      | 3.430(1)           |
| <b>D2...D3</b>  | S12...S26     | 3.426(1)           |
|                 | S17...S26     | 3.548(1)           |
|                 | S17...S28     | 3.451(1)           |
| <b>D3...D3</b>  | S23...S30     | 3.669(2)           |
| <b>D3...D4</b>  | S22...S36     | 3.527(1)           |
|                 | S24...S31     | 3.464(1)           |
|                 | S27...S36     | 3.563(1)           |
|                 | S27...S38     | 3.526(1)           |



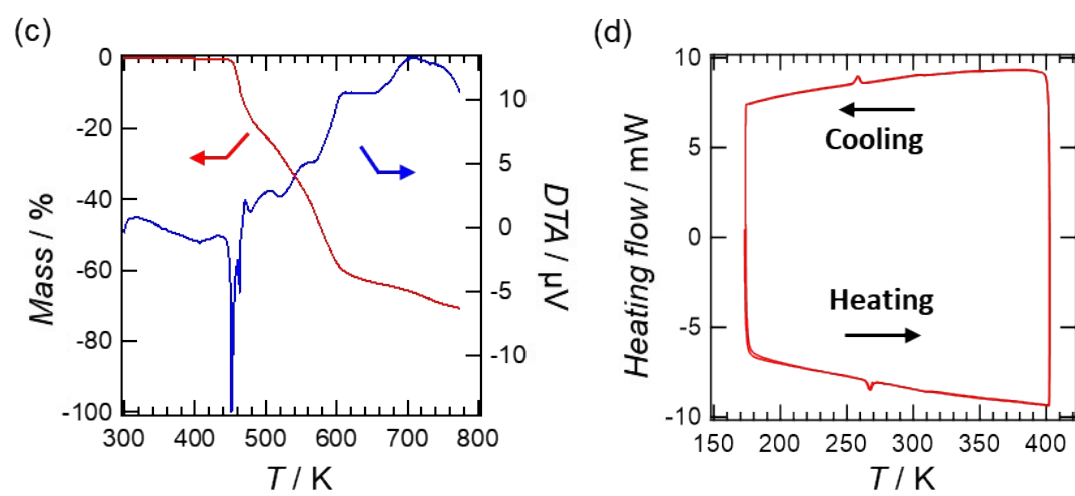

**§Figure S2.** (a) TG-DTA measurement for crystal **1**. (b) DSC from 170 to 400 K.

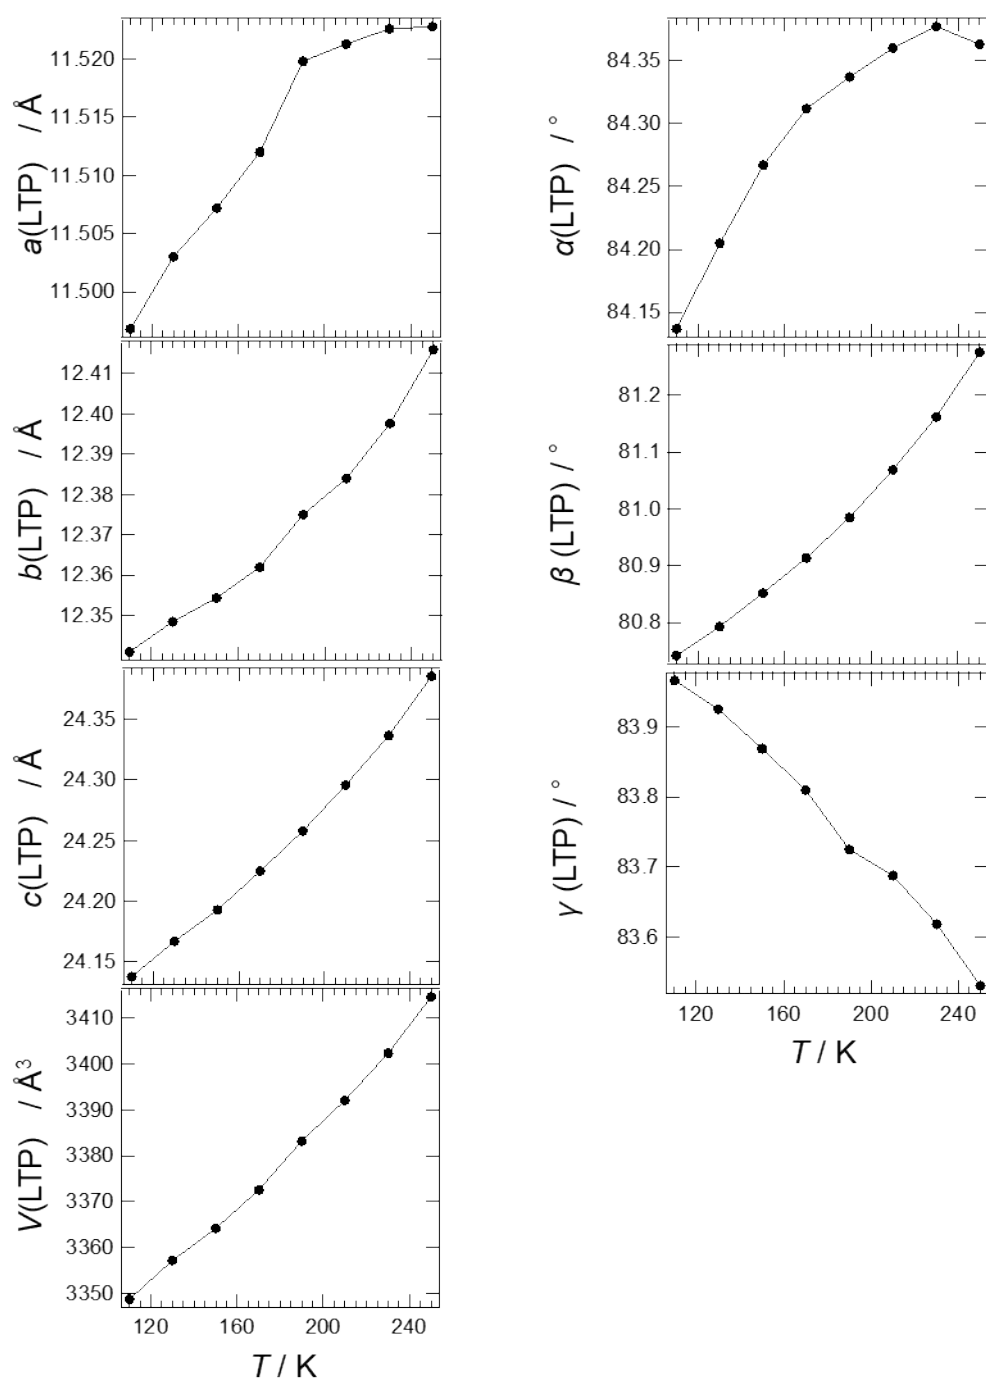

**§Figure S3.** Temperature dependence of unit cell dimensions and volume for crystal **1** over which the same crystal was studied. (LTP : Low Temperature phase)

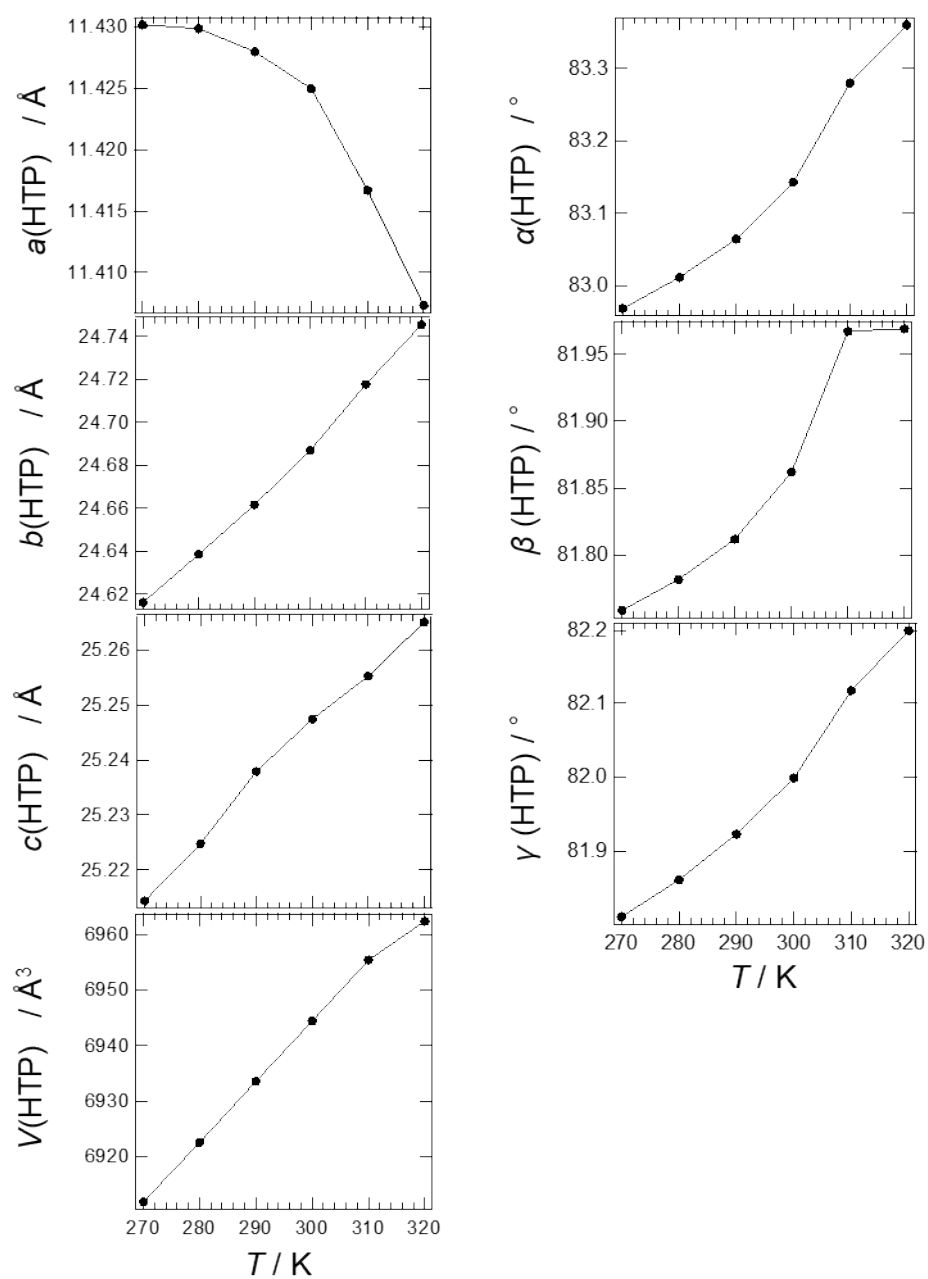

**§Figure S4.** Temperature dependence of unit cell dimensions and volume for crystal 1 over which the same crystal was studied. (HTP : High Temperature phase)

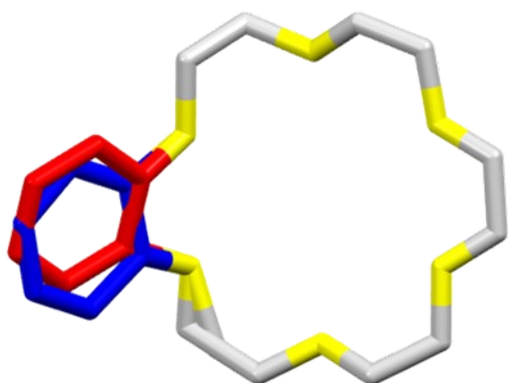

**§Figure S5.** Molecular structure **CEB2**, which is depicted in stick model, in crystal **1** at 310 K. The occupancies of the red and blue phenylene moieties in **CEB2** are 0.12, 0.88 and 0.29, 0.71 at 310 and 320 K, respectively.

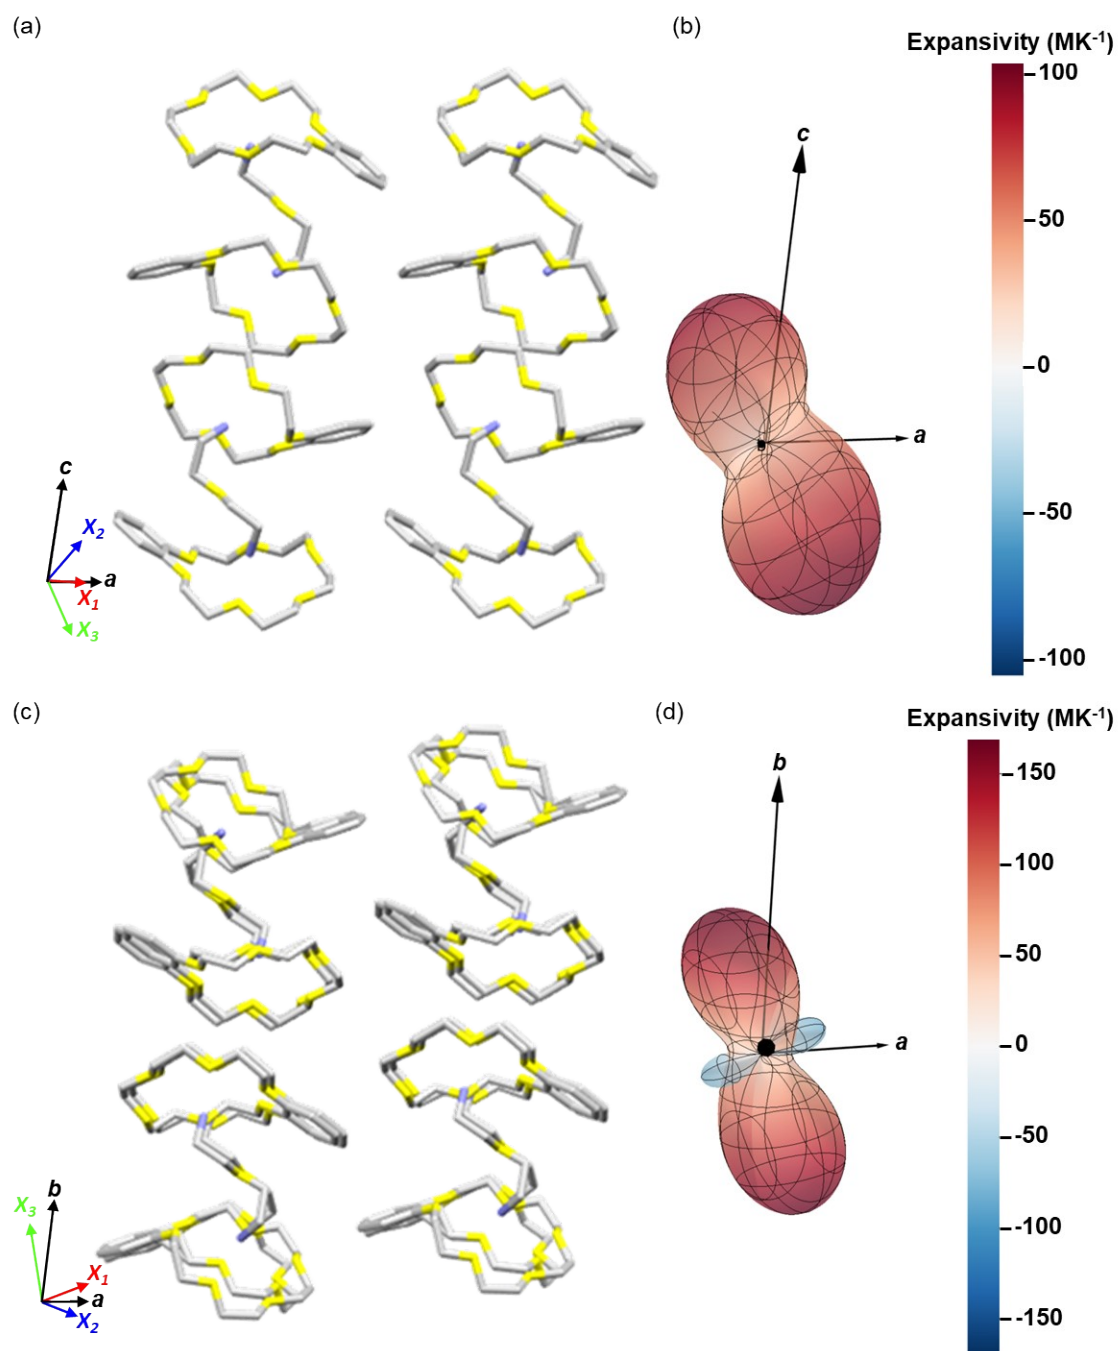

**§Figure S6.** The structure of supramolecular cations (a, c) and corresponding indicatrix plots (b, d) of LTP (a, b) and HTP (c, d) for **1**. PASCAL indicatrix Plotter was used to plot the data. The software was obtained from the web site: <https://www.pascalapp.co.uk/>

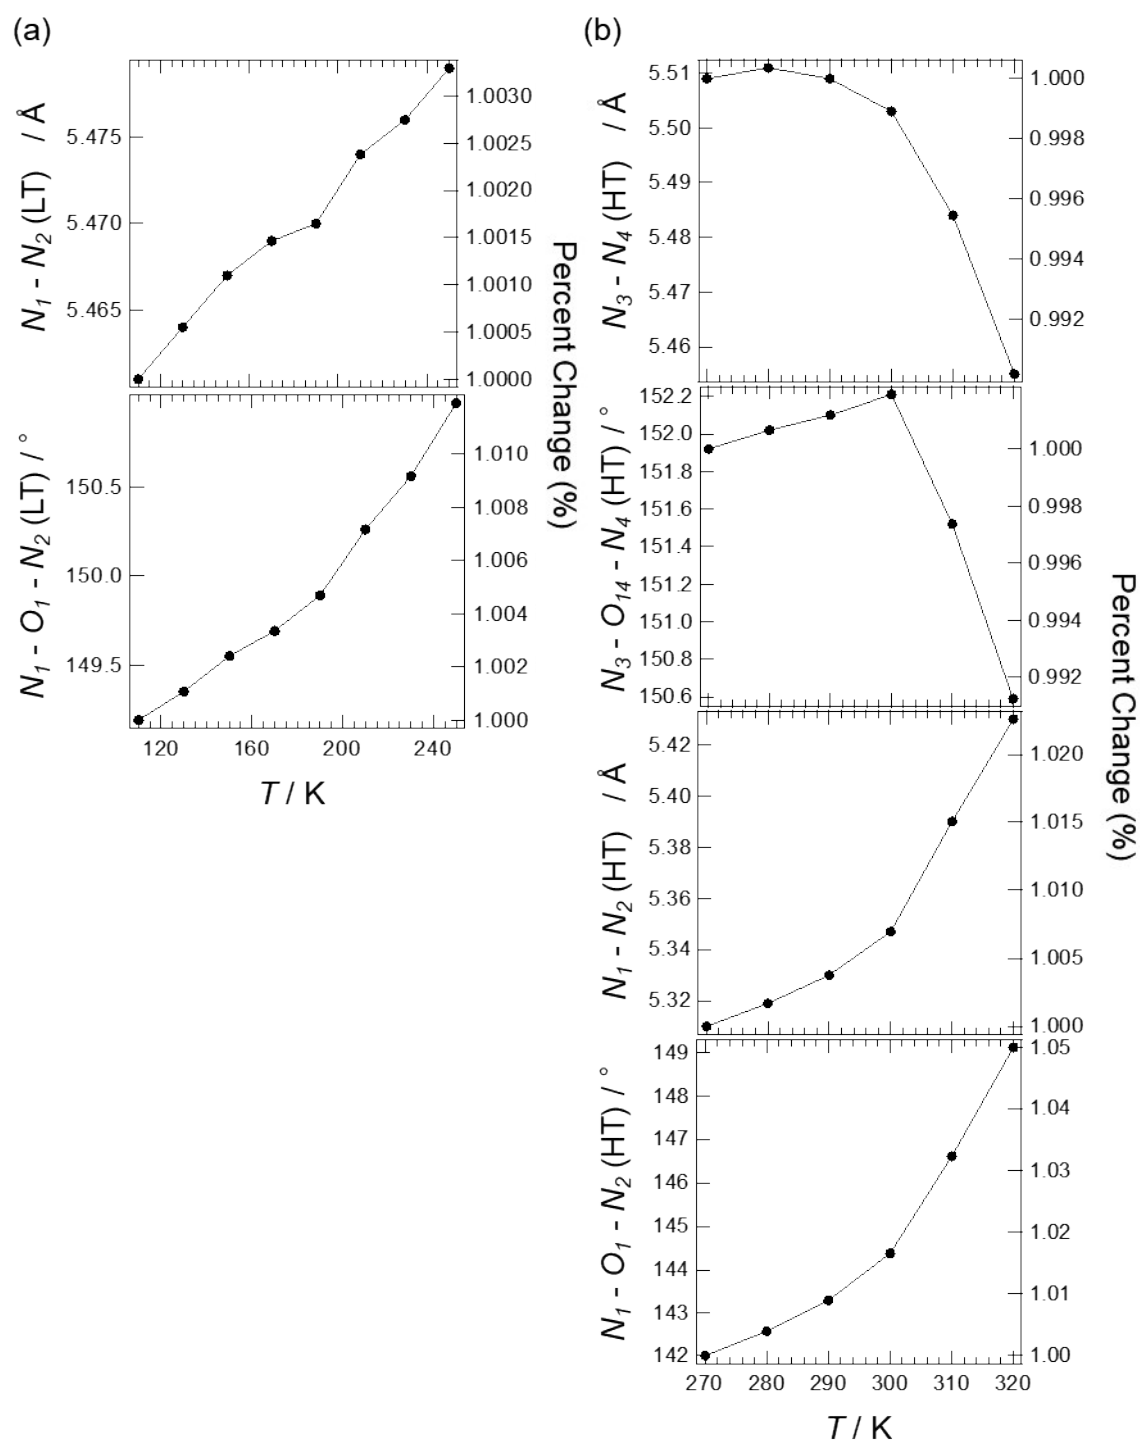

**§Figure S7.** Temperature dependence of the intramolecular N...N interatomic distance and N...O...N angles (left axis) and compared with each value at 110 K (right axis) for crystal **1** LTP (a) and HTP (b).

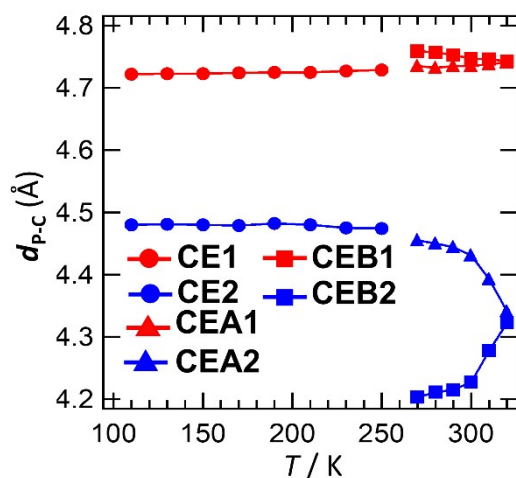

**§Figure S8.** Temperature dependence of  $d_{p-c}$  in LTP and HTP.

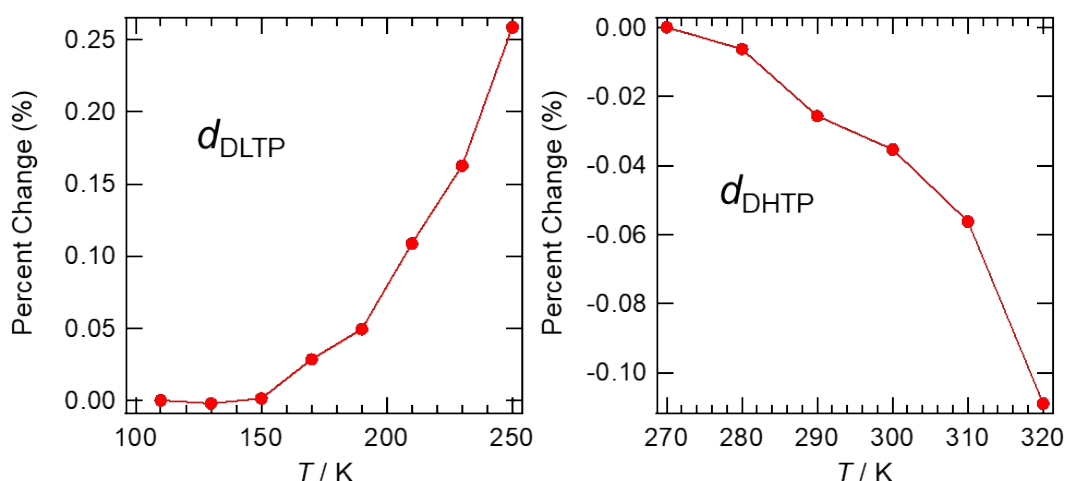

**§Figure S9.** Temperature dependence of percental change in the average net molecular length along the  $X_1$  direction (denoted as (a)  $d_{DLTP}$  in LTP and (b)  $d_{DHTP}$  in HTP), resulting from the inclination between the (560) plane in LTP or the (1 -5 5) plane in HTP and the anion molecular plane.

In LTP and HTP, we defined the molecular plane for each  $[\text{Ni}(\text{dmit})_2]^-$  (LTP: D1~D3, HTP: D1~D4) molecule. Next, we calculated the angle  $\theta$  between the molecular plane and the crystal plane [(560) or (1-55)] in each phase and determined  $\cos\theta$  (the cosine value of the angle between the molecular plane and the  $X_1$  or  $X_1'$  direction). For each molecule in LTP and HTP, we calculated the averaged value of  $\cos\theta$ , and based on the averaged value at the lowest temperature in each phase, we denoted the calculated temperature change rate as  $d_{DLTP}$  and  $d_{DHTP}$ .

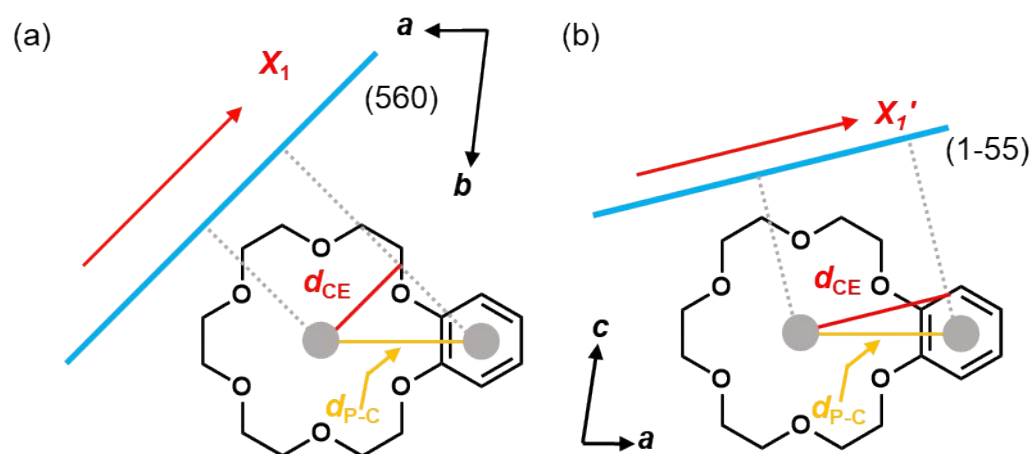

**§Figure S10.** Schematic views of **CE2** are shown for (a) LTP with the (560) plane viewed from the c axis and for (b) HTP with the (1-55) plane viewed from the b axis.



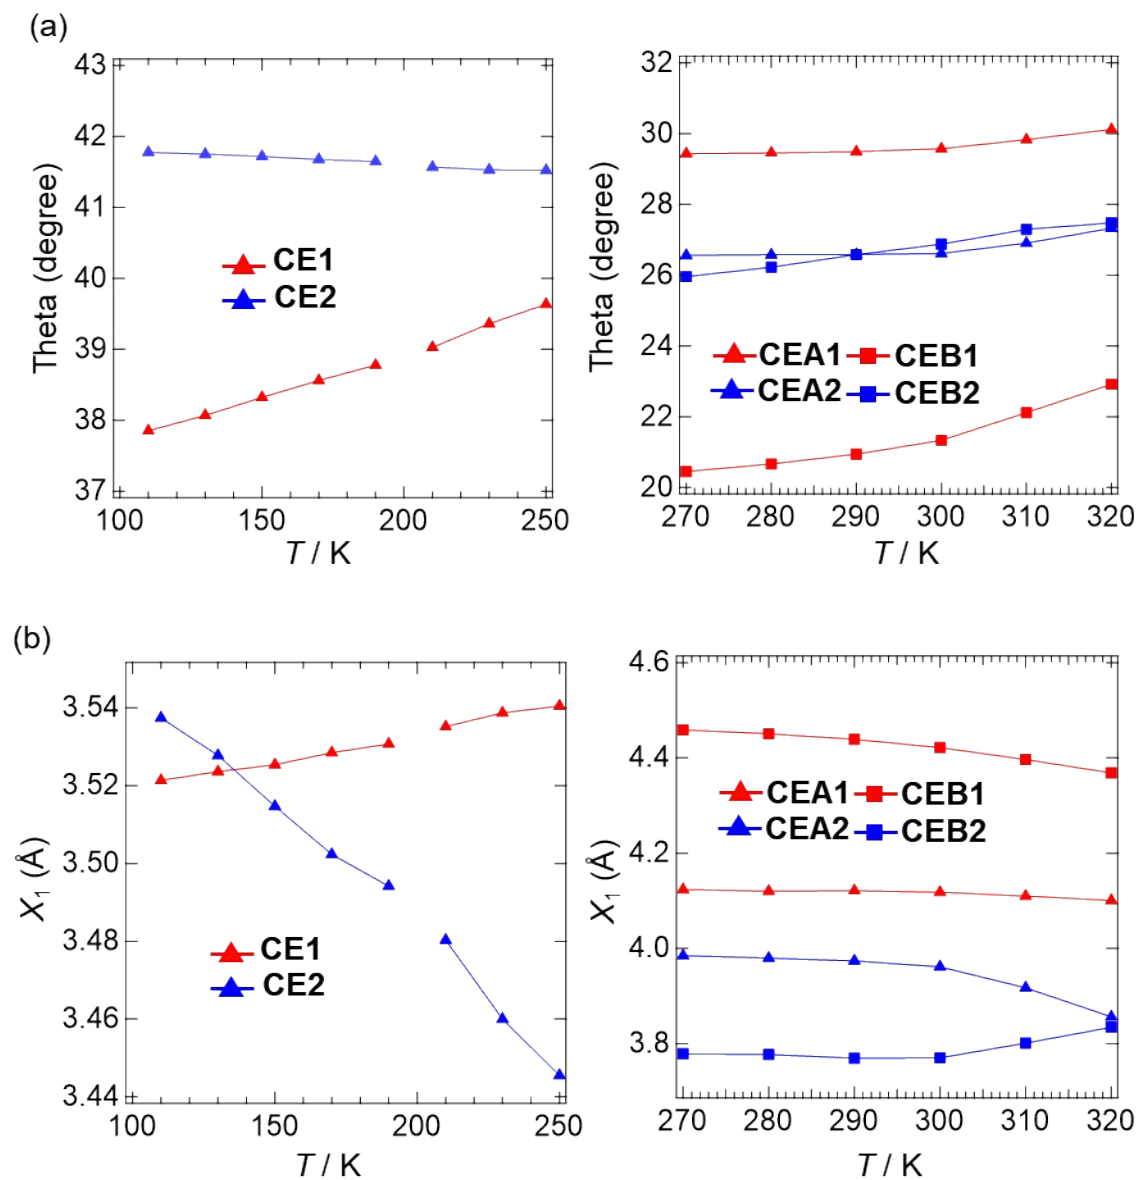

**§Figure S11.** Temperature dependence of (a) angle and (b) distance of  $d_{CE}$  measured in LTP and HTP

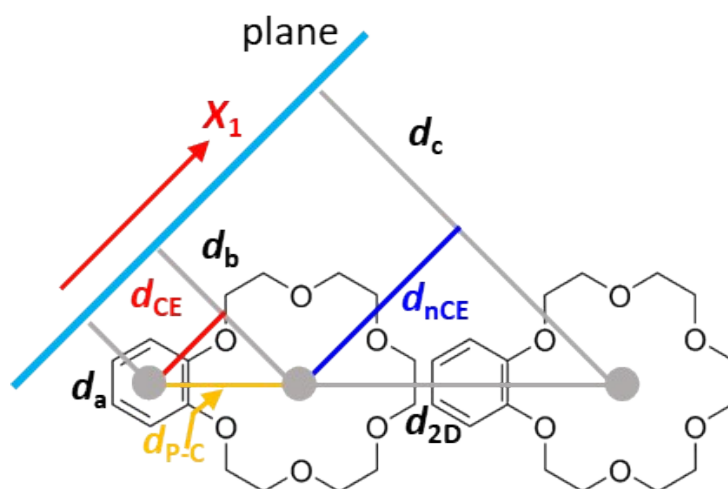

**§Figure S12.** Schematic view of the supramolecular cation layer and plane. The  $d_{P-C}$  is the distance between the two centers of the crown ring of B[18]crown-6 and the phenylene ring. The  $d_{CE}$  and  $d_{nCE}$  are the projections of  $d_{P-C}$  and  $a$ -axis length in the  $X_1$  direction, respectively (see text).  $d_a$  is the distance from the center point of the phenylene group to the plane;  $d_b$  is the distance from the center point to the crown ether to the plane;  $d_c$  is the distance from the center point to the plane of the adjacent crown ether;  $d_{2D}$  is the distance between the center point of the crown ether and the center point of the adjacent crown ether.

$d_{CE}$  is obtained by the following equation.

$$d_{CE} = d_{P-C} \times \cos\{\sin^{-1}[(d_b - d_a)/d_{P-C}]\}$$

$d_{nCE}$  is obtained by the following equation.

$$d_{nCE} = d_{2D} \times \cos\{\sin^{-1}[(d_c - d_b)/d_{2D}]\}$$

$d_{CEave}$  calculated the center-to-center distance ( $d_{CE}$ ) of each benzo[18]crown-6 molecule for all crown molecule pairs in the crystal and used the average value.

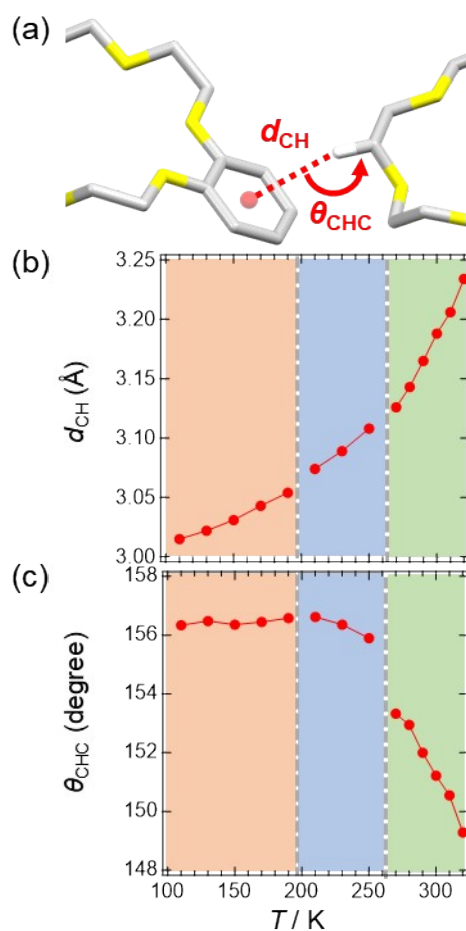

**§Figure S13.** (a) Schematic diagram of the nearest-neighbor distance ( $d_{CH}$ , red dotted line) between the carbon atom center of the phenylene group in B[18]Crown-6 and the hydrogen atom of the crown ether ring involved in the C-H... $\pi$  interaction, and the corresponding C-H...C interatomic angle ( $\theta_{CHC}$ , red arrow). (b)  $d_{CH}$  and (c)  $\theta_{CHC}$  between **CE1...CE1** (LTP) and **CEA1...CEA1** (HTP).

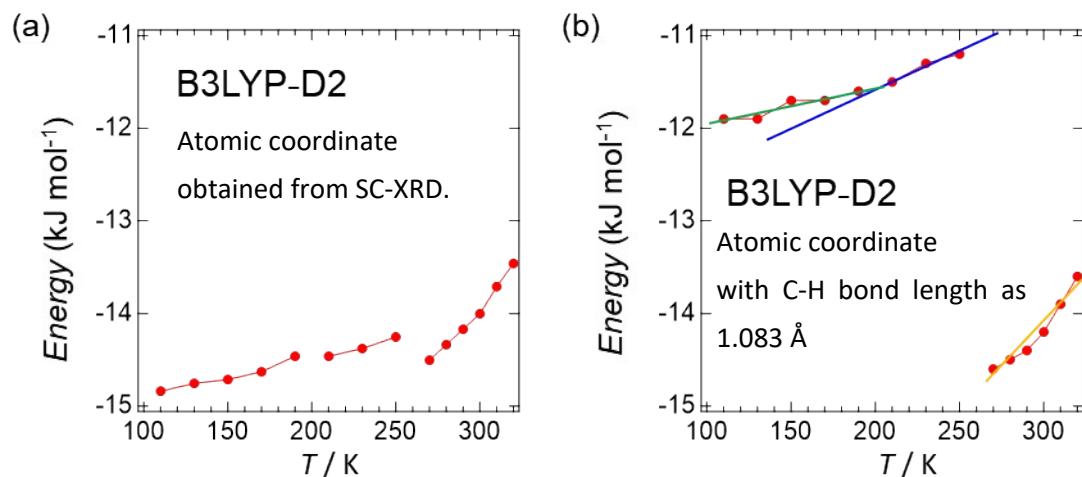

**§Figure S14.** Temperature dependence of interaction energies. (a) Interaction energies estimated from calculations at the B3LYP/6-31G(d,p) level using atomic coordinates obtained from X-ray crystal structure analysis. Grimme's D2 dispersion model was used for dispersion correction. Calculations were performed using the GAUSSIAN16 code package. (b) Interaction energies estimated from calculations at the B3LYP/6-31G(d,p) level with D2 dispersion correction, after correcting the C-H bond length to 1.083 Å, as obtained from neutron diffraction.

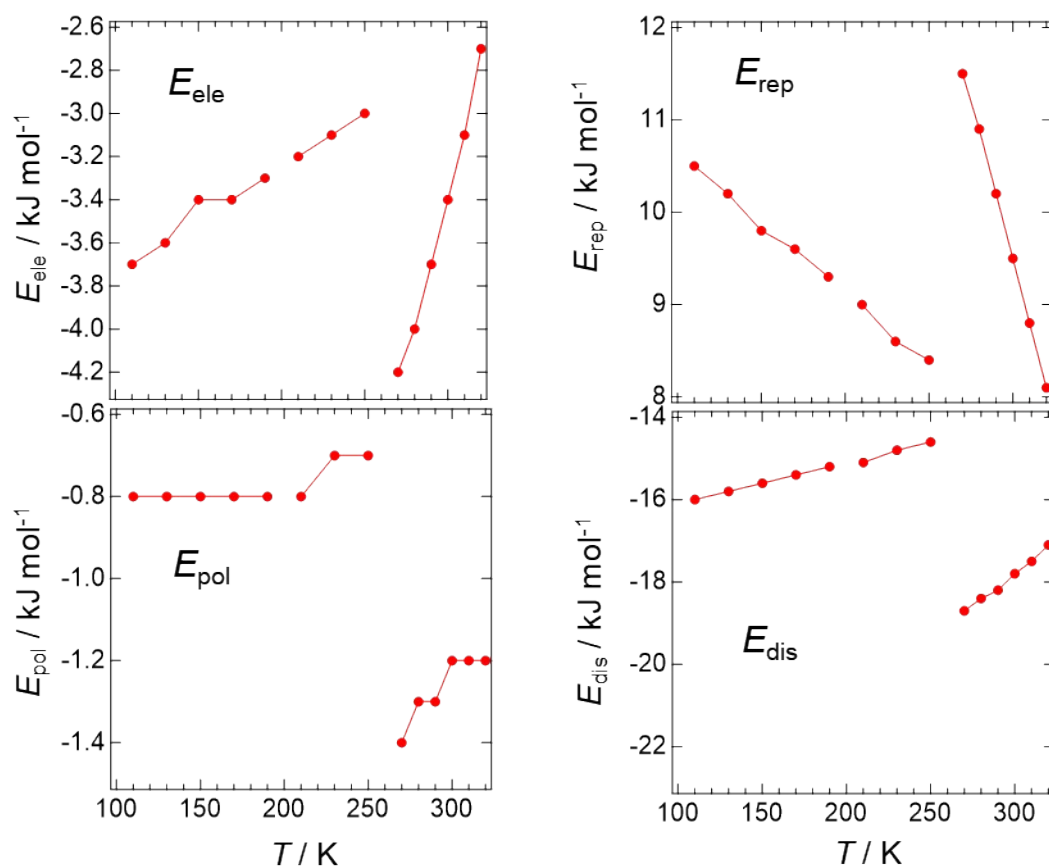

**§Figure S15.** Temperature-dependence of the four energy components of intermolecular interaction energies, electrostatic ( $E_{\text{ele}}$ ), polarization ( $E_{\text{pol}}$ ), exchange-repulsion ( $E_{\text{rep}}$ ), and dispersion ( $E_{\text{dis}}$ ) forces. These were isolated and quantified based on D2 dispersion correction after C-H bond length correction, using a combination of Crystal Explorer 21 and Gaussian 16 software.

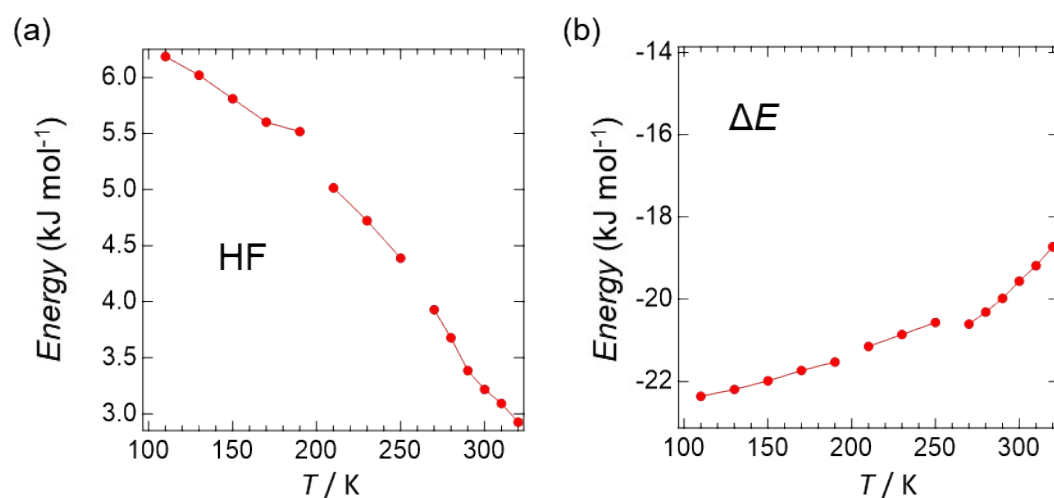

**§Figure S16.** (a) Interaction energies calculated at the HF/6-31G(d,p) level. Calculations were performed using the GAUSSIAN16. (b) Temperature dependence of the difference in interaction energies ( $\Delta E$ ) between the B3LYP-D3/6-31G(d,p) level (Figure 6c) and the HF/6-31G(d,p) level.  $\Delta E$  corresponds to the dispersion force based on the D3 dispersion correction based on the atomic coordinate obtained from X-ray crystal structure analysis.

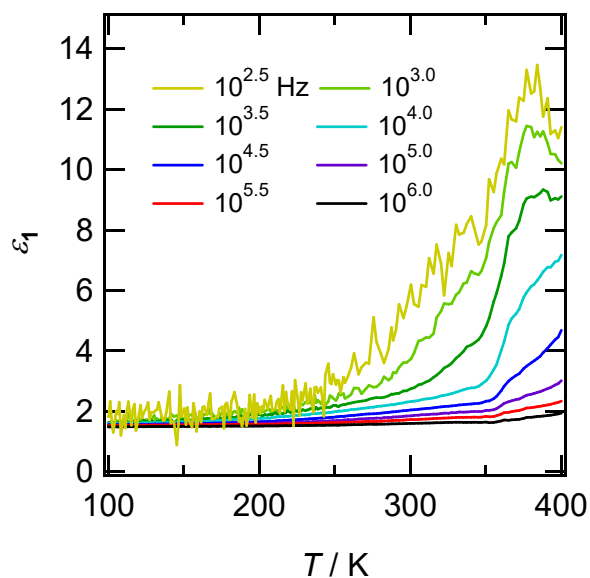

**§Figure S17.** Temperature- and frequency-dependent real part of dielectric permittivity from 100 to 400 K for pelletized sample of **1**.

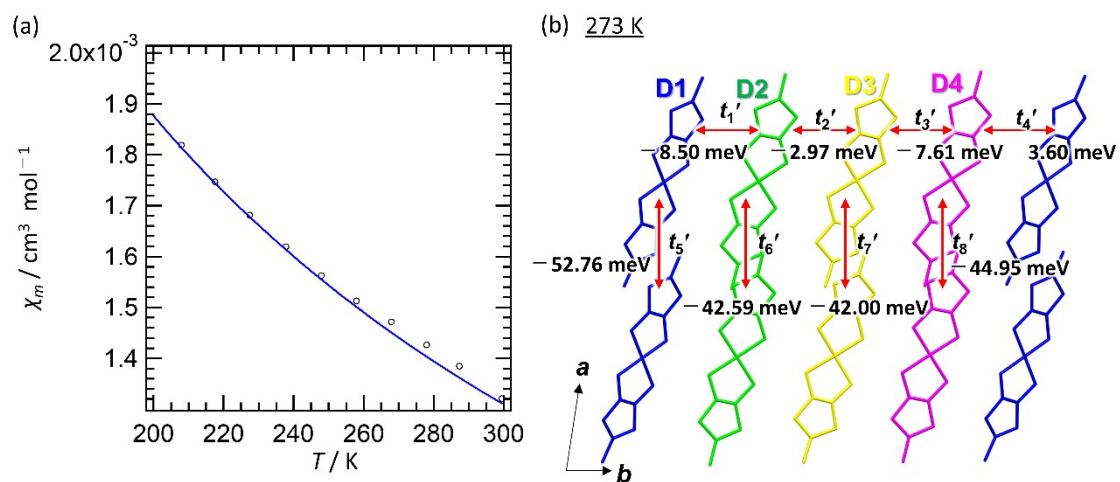

**§Figure S18.** (a) Temperature dependence of the molar magnetic susceptibility of crystal **1** ( $\chi_m$  versus  $T$  plot). The blue lines are fitting curves reproduced using the 2D AF model with parameters Curie constant  $0.43 \text{ cm}^3 \text{ K mol}^{-1}$ , magnetic exchange interaction  $J_1/k_B = 47.9 \text{ K}$ , and  $J_2/k_B = 2.63 \text{ K}$ . (b) Transfer integral between  $[\text{Ni}(\text{dmit})_2]^-$  for crystal **1** at 270 K.

**Table S7.** Crystal data, data collection, and reduction parameters for crystal **1**.

| Crystal                                         | <b>1</b>                                                                                       |             |             |
|-------------------------------------------------|------------------------------------------------------------------------------------------------|-------------|-------------|
| <i>Temperature / K</i>                          | 110                                                                                            | 130         | 150         |
| <i>Crystal Dimensions / mm<sup>3</sup></i>      | 0.2×0.4×0.5                                                                                    |             |             |
| <i>Chemical formula</i>                         | C <sub>48</sub> H <sub>62</sub> N <sub>2</sub> Ni <sub>2</sub> O <sub>13</sub> S <sub>20</sub> |             |             |
| <i>Formula weight</i>                           | 1633.61                                                                                        |             |             |
| <i>Crystal system</i>                           | Triclinic                                                                                      |             |             |
| <i>Space group</i>                              | $P\bar{1}$                                                                                     |             |             |
| <i>a / Å</i>                                    | 11.4968(10)                                                                                    | 11.5030(10) | 11.5072(10) |
| <i>b / Å</i>                                    | 12.3410(10)                                                                                    | 12.3485(10) | 12.3544(10) |
| <i>c / Å</i>                                    | 24.1378(3)                                                                                     | 24.1670(3)  | 24.1929(3)  |
| <i>α / deg</i>                                  | 84.1370(10)                                                                                    | 84.2050(10) | 84.2670(10) |
| <i>β / deg</i>                                  | 80.7420(10)                                                                                    | 80.7930(10) | 80.8520(10) |
| <i>γ / deg</i>                                  | 83.9660(10)                                                                                    | 83.9250(10) | 83.8690(10) |
| <i>V / Å<sup>3</sup></i>                        | 3348.68(6)                                                                                     | 3357.17(6)  | 3364.14(6)  |
| <i>Z</i>                                        | 2                                                                                              |             |             |
| <i>D<sub>calc</sub> / g·cm<sup>-3</sup></i>     | 1.620                                                                                          | 1.616       | 1.613       |
| <i>μ(Mo K<sub>α</sub>) / mm<sup>-1</sup></i>    | 1.244                                                                                          | 1.241       | 1.238       |
| <i>2θ<sub>max</sub> / deg</i>                   | 62.422                                                                                         | 62.402      | 62.552      |
| <i>Reflections measured</i>                     | 89076                                                                                          | 89410       | 89551       |
| <i>Independent reflections</i>                  | 18335                                                                                          | 18389       | 18427       |
| <i>Reflections used</i>                         | 18335                                                                                          | 18389       | 18427       |
| <i>R<sub>1</sub><sup>a</sup></i>                | 0.0318                                                                                         | 0.0324      | 0.0333      |
| <i>R<sub>w</sub>(F<sup>2</sup>)<sup>a</sup></i> | 0.0740                                                                                         | 0.0739      | 0.0742      |
| <i>GOF</i>                                      | 1.034                                                                                          | 1.029       | 1.032       |
| <i>CCDC No.</i>                                 | 2444930                                                                                        | 2444931     | 2444932     |

<sup>a</sup>  $R_1 = \sum ||F_o| - |F_c|| / \sum |F_o|$  and  $R_w = (\sum \omega (|F_o| - |F_c|)^2 / \sum \omega F_o^2)^{1/2}$ .



| Crystal                                         | <b>1</b>                                                                                       |             |             |
|-------------------------------------------------|------------------------------------------------------------------------------------------------|-------------|-------------|
| <i>Temperature / K</i>                          | 170                                                                                            | 190         | 210         |
| <i>Crystal Dimensions / mm<sup>3</sup></i>      | 0.2×0.4×0.4                                                                                    |             |             |
| <i>Chemical formula</i>                         | C <sub>48</sub> H <sub>62</sub> N <sub>2</sub> Ni <sub>2</sub> O <sub>13</sub> S <sub>20</sub> |             |             |
| <i>Formula weight</i>                           | 1633.61                                                                                        |             |             |
| <i>Crystal system</i>                           | <i>Triclinic</i>                                                                               |             |             |
| <i>Space group</i>                              | <i>P</i> $\bar{1}$                                                                             |             |             |
| <i>a / Å</i>                                    | 11.5120(10)                                                                                    | 11.5198(10) | 11.5213(10) |
| <i>b / Å</i>                                    | 12.3620(10)                                                                                    | 12.3750(2)  | 12.3840(10) |
| <i>c / Å</i>                                    | 24.2250(3)                                                                                     | 24.2580(4)  | 24.2959(3)  |
| <i>α / deg</i>                                  | 84.3120(10)                                                                                    | 84.3370(2)  | 84.3600(10) |
| <i>β / deg</i>                                  | 80.9140(10)                                                                                    | 80.9850(10) | 81.0690(10) |
| <i>γ / deg</i>                                  | 83.8100(10)                                                                                    | 83.7250(10) | 83.6880(10) |
| <i>V / Å<sup>3</sup></i>                        | 3372.54(6)                                                                                     | 3383.25(9)  | 3392.09(6)  |
| <i>Z</i>                                        | 2                                                                                              |             |             |
| <i>D<sub>calc</sub> / g·cm<sup>-3</sup></i>     | 1.609                                                                                          | 1.604       | 1.599       |
| <i>μ(Mo K<sub>α</sub>) / mm<sup>-1</sup></i>    | 1.235                                                                                          | 1.232       | 1.228       |
| <i>2θ<sub>max</sub> / deg</i>                   | 62.030                                                                                         | 62.608      | 61.650      |
| <i>Reflections measured</i>                     | 89704                                                                                          | 89976       | 90228       |
| <i>Independent reflections</i>                  | 18464                                                                                          | 18507       | 18568       |
| <i>Reflections used</i>                         | 18464                                                                                          | 18507       | 18568       |
| <i>R<sub>1</sub><sup>a</sup></i>                | 0.0340                                                                                         | 0.0353      | 0.0362      |
| <i>R<sub>w</sub>(F<sup>2</sup>)<sup>a</sup></i> | 0.0760                                                                                         | 0.0774      | 0.0787      |
| <i>GOF</i>                                      | 1.031                                                                                          | 1.032       | 1.064       |
| <i>CCDC No.</i>                                 | 2444933                                                                                        | 2444934     | 2444938     |

<sup>a</sup>  $R_1 = \Sigma||F_o| - |F_c|| / \Sigma|F_o|$  and  $R_w = (\Sigma\omega(|F_o| - |F_c|)^2 / \Sigma\omega F_o^2)^{1/2}$ .

| Crystal                                         | 1                                                                                              |             |                                                                                                 |
|-------------------------------------------------|------------------------------------------------------------------------------------------------|-------------|-------------------------------------------------------------------------------------------------|
| <i>Temperature / K</i>                          | 230                                                                                            | 250         | 270                                                                                             |
| <i>Crystal Dimensions / mm<sup>3</sup></i>      | 0.2×0.4×0.5                                                                                    |             | 0.2×0.3×0.4                                                                                     |
| <i>Chemical formula</i>                         | C <sub>48</sub> H <sub>62</sub> N <sub>2</sub> Ni <sub>2</sub> O <sub>13</sub> S <sub>20</sub> |             | C <sub>96</sub> H <sub>124</sub> N <sub>4</sub> Ni <sub>4</sub> O <sub>26</sub> S <sub>40</sub> |
| <i>Formula weight</i>                           | 1633.61                                                                                        |             | 3267.22                                                                                         |
| <i>Crystal system</i>                           | <i>Triclinic</i>                                                                               |             |                                                                                                 |
| <i>Space group</i>                              | <i>P</i> $\bar{1}$                                                                             |             |                                                                                                 |
| <i>a / Å</i>                                    | 11.5226(10)                                                                                    | 11.5228(2)  | 11.42954(10)                                                                                    |
| <i>b / Å</i>                                    | 12.3976(2)                                                                                     | 12.4159(2)  | 24.6170(3)                                                                                      |
| <i>c / Å</i>                                    | 24.3366(3)                                                                                     | 24.3855(3)  | 25.2122(2)                                                                                      |
| <i>α / deg</i>                                  | 84.3770(10)                                                                                    | 84.3630(10) | 82.9754(8)                                                                                      |
| <i>β / deg</i>                                  | 81.1620(10)                                                                                    | 81.2760(10) | 81.7651(8)                                                                                      |
| <i>γ / deg</i>                                  | 83.6190(10)                                                                                    | 83.5310(10) | 81.8090(8)                                                                                      |
| <i>V / Å<sup>3</sup></i>                        | 3402.38(8)                                                                                     | 3414.70(9)  | 6911.28(12)                                                                                     |
| <i>Z</i>                                        | 2                                                                                              |             |                                                                                                 |
| <i>D<sub>calc</sub> / g·cm<sup>-3</sup></i>     | 1.595                                                                                          | 1.589       | 1.570                                                                                           |
| <i>μ(Mo K<sub>α</sub>) / mm<sup>-1</sup></i>    | 1.225                                                                                          | 1.220       | 1.206                                                                                           |
| <i>2θ<sub>max</sub> / deg</i>                   | 61.436                                                                                         | 59.850      | 58.670                                                                                          |
| <i>Reflections measured</i>                     | 90563                                                                                          | 90983       | 101119                                                                                          |
| <i>Independent reflections</i>                  | 18634                                                                                          | 18713       | 32371                                                                                           |
| <i>Reflections used</i>                         | 18634                                                                                          | 18713       | 32371                                                                                           |
| <i>R<sub>1</sub><sup>a</sup></i>                | 0.0382                                                                                         | 0.0404      | 0.0547                                                                                          |
| <i>R<sub>w</sub>(F<sup>2</sup>)<sup>a</sup></i> | 0.0831                                                                                         | 0.0879      | 0.1295                                                                                          |
| <i>GOF</i>                                      | 1.027                                                                                          | 1.026       | 1.067                                                                                           |
| <i>CCDC No.</i>                                 | 2444936                                                                                        | 2444937     | 2444935                                                                                         |

<sup>a</sup>  $R_1 = \Sigma||F_o| - |F_c|| / \Sigma|F_o|$  and  $R_w = (\Sigma w(|F_o| - |F_c|)^2 / \Sigma w F_o^2)^{1/2}$ .

| Crystal                                         | 1                                                                                               |             |             |
|-------------------------------------------------|-------------------------------------------------------------------------------------------------|-------------|-------------|
| <i>Temperature / K</i>                          | 280                                                                                             | 290         | 300         |
| <i>Crystal Dimensions / mm<sup>3</sup></i>      | 0.2×0.4×0.5                                                                                     |             |             |
| <i>Chemical formula</i>                         | C <sub>96</sub> H <sub>124</sub> N <sub>4</sub> Ni <sub>4</sub> O <sub>26</sub> S <sub>40</sub> |             |             |
| <i>Formula weight</i>                           | 3267.22                                                                                         |             |             |
| <i>Crystal system</i>                           | Triclinic                                                                                       |             |             |
| <i>Space group</i>                              | $P\bar{1}$                                                                                      |             |             |
| <i>a / Å</i>                                    | 11.4299(10)                                                                                     | 11.4280(10) | 11.4250(10) |
| <i>b / Å</i>                                    | 24.6386(3)                                                                                      | 24.6616(3)  | 24.6870(3)  |
| <i>c / Å</i>                                    | 25.2248(3)                                                                                      | 25.2379(3)  | 25.2474(3)  |
| <i>α / deg</i>                                  | 83.0120(10)                                                                                     | 83.0650(10) | 83.1430(10) |
| <i>β / deg</i>                                  | 81.7820(10)                                                                                     | 81.8120(10) | 81.8620(10) |
| <i>γ / deg</i>                                  | 81.8610(10)                                                                                     | 81.9230(10) | 81.9990(10) |
| <i>V / Å<sup>3</sup></i>                        | 6922.57(14)                                                                                     | 6933.60(14) | 6944.49(14) |
| <i>Z</i>                                        | 2                                                                                               |             |             |
| <i>D<sub>calc</sub> / g·cm<sup>-3</sup></i>     | 1.567                                                                                           | 1.565       | 1.562       |
| <i>μ(Mo K<sub>α</sub>) / mm<sup>-1</sup></i>    | 1.204                                                                                           | 1.202       | 1.200       |
| <i>2θ<sub>max</sub> / deg</i>                   | 58.552                                                                                          | 58.820      | 58.622      |
| <i>Reflections measured</i>                     | 101119                                                                                          | 101196      | 101215      |
| <i>Independent reflections</i>                  | 32371                                                                                           | 32410       | 32451       |
| <i>Reflections used</i>                         | 32371                                                                                           | 32410       | 32451       |
| <i>R<sub>1</sub><sup>a</sup></i>                | 0.0542                                                                                          | 0.0597      | 0.0668      |
| <i>R<sub>w</sub>(F<sup>2</sup>)<sup>a</sup></i> | 0.1279                                                                                          | 0.1412      | 0.1553      |
| <i>GOF</i>                                      | 1.062                                                                                           | 1.066       | 1.080       |
| <i>CCDC No.</i>                                 | 2444939                                                                                         | 2444940     | 2444941     |

<sup>a</sup>  $R_1 = \Sigma ||F_o| - |F_c|| / \Sigma |F_o|$  and  $R_w = (\Sigma \omega (|F_o| - |F_c|)^2 / \Sigma \omega F_o^2)^{1/2}$ .

| Crystal                                         | <b>1</b>                                                                                        |             |
|-------------------------------------------------|-------------------------------------------------------------------------------------------------|-------------|
| <i>Temperature / K</i>                          | 310                                                                                             | 320         |
| <i>Crystal Dimensions / mm<sup>3</sup></i>      | 0.2×0.4×0.5                                                                                     |             |
| <i>Chemical formula</i>                         | C <sub>96</sub> H <sub>124</sub> N <sub>4</sub> Ni <sub>4</sub> O <sub>26</sub> S <sub>40</sub> |             |
| <i>Formula weight</i>                           | 3267.22                                                                                         |             |
| <i>Crystal system</i>                           | <i>Triclinic</i>                                                                                |             |
| <i>Space group</i>                              | <i>P</i> $\bar{1}$                                                                              |             |
| <i>a / Å</i>                                    | 11.4167(2)                                                                                      | 11.4073(16) |
| <i>b / Å</i>                                    | 24.7178(4)                                                                                      | 24.7456(4)  |
| <i>c / Å</i>                                    | 25.2552(3)                                                                                      | 25.2650(4)  |
| <i>α / deg</i>                                  | 83.2800(10)                                                                                     | 83.3596(13) |
| <i>β / deg</i>                                  | 81.9670(10)                                                                                     | 81.9689(12) |
| <i>γ / deg</i>                                  | 82.1170(10)                                                                                     | 82.1983(13) |
| <i>V / Å<sup>3</sup></i>                        | 6955.42(19)                                                                                     | 6962.43(18) |
| <i>Z</i>                                        | 2                                                                                               |             |
| <i>D<sub>calc</sub> / g·cm<sup>-3</sup></i>     | 1.560                                                                                           | 1.558       |
| <i>μ(Mo K<sub>α</sub>) / mm<sup>-1</sup></i>    | 1.198                                                                                           | 1.197       |
| <i>2θ<sub>max</sub> / deg</i>                   | 58.558                                                                                          | 58.398      |
| <i>Reflections measured</i>                     | 100676                                                                                          | 100924      |
| <i>Independent reflections</i>                  | 32507                                                                                           | 32541       |
| <i>Reflections used</i>                         | 32507                                                                                           | 32541       |
| <i>R<sub>1</sub><sup>a</sup></i>                | 0.0744                                                                                          | 0.0856      |
| <i>R<sub>w</sub>(F<sup>2</sup>)<sup>a</sup></i> | 0.1856                                                                                          | 0.2228      |
| <i>GOF</i>                                      | 1.009                                                                                           | 1.047       |
| <i>CCDC No.</i>                                 | 2444942                                                                                         | 2444943     |

<sup>a</sup>  $R_1 = \sum ||F_o| - |F_c|| / \sum |F_o|$  and  $R_w = (\sum \omega (|F_o| - |F_c|)^2 / \sum \omega F_o^2)^{1/2}$ .

**Table S8.** output file of *PASCa/* calculation for crystal **1** between 110 to 250 K.

| Output                |                              |                                    | Direction |          |          |
|-----------------------|------------------------------|------------------------------------|-----------|----------|----------|
| Axes                  | $\alpha$ (MK <sup>-1</sup> ) | $\sigma\alpha$ (MK <sup>-1</sup> ) | <i>a</i>  | <i>b</i> | <i>c</i> |
| <i>X</i> <sub>1</sub> | -6.4187                      | 2.1692                             | 0.77      | -0.6381  | -0.0032  |
| <i>X</i> <sub>2</sub> | 39.8465                      | 4.1568                             | 0.6006    | 0.7031   | 0.3808   |
| <i>X</i> <sub>3</sub> | 105.0712                     | 2.2411                             | 0.6199    | 0.5858   | -0.5221  |
| <i>V</i>              | 139.1332                     | 4.3935                             |           |          |          |

---

**% Change in length**

| <i>T</i> (K) | <i>X</i> <sub>1</sub> (%) | <i>X</i> <sub>2</sub> (%) | <i>X</i> <sub>3</sub> (%) | <i>X</i> <sub>1,calc</sub> (%) | <i>X</i> <sub>2,calc</sub> (%) | <i>X</i> <sub>3,calc</sub> (%) |
|--------------|---------------------------|---------------------------|---------------------------|--------------------------------|--------------------------------|--------------------------------|
| 110          | 0                         | 0                         | 0                         | 0.0269                         | -0.0562                        | -0.0268                        |
| 130          | 0.0153                    | 0.0431                    | 0.1949                    | 0.0141                         | 0.0235                         | 0.1834                         |
| 150          | 0.0037                    | 0.0753                    | 0.3823                    | 0.0013                         | 0.1032                         | 0.3935                         |
| 170          | -0.0014                   | 0.1328                    | 0.58                      | -0.0116                        | 0.1829                         | 0.6037                         |
| 190          | -0.0015                   | 0.2337                    | 0.7977                    | -0.0244                        | 0.2626                         | 0.8138                         |
| 210          | -0.01                     | 0.304                     | 0.9982                    | -0.0372                        | 0.3423                         | 1.024                          |
| 230          | -0.0444                   | 0.4132                    | 1.2287                    | -0.0501                        | 0.4219                         | 1.2341                         |
| 250          | -0.1055                   | 0.5796                    | 1.4882                    | -0.0629                        | 0.5016                         | 1.4442                         |

---

**Volume**

| <i>T</i> / K | <i>V</i> / Å <sup>3</sup> | <i>V</i> <sub>lin</sub> / Å <sup>3</sup> |
|--------------|---------------------------|------------------------------------------|
| 110          | 3348.682                  | 3346.754                                 |
| 130          | 3357.17                   | 3356.072                                 |
| 150          | 3364.141                  | 3365.39                                  |
| 170          | 3372.536                  | 3374.709                                 |
| 190          | 3383.247                  | 3384.027                                 |
| 210          | 3392.084                  | 3393.345                                 |
| 230          | 3402.379                  | 3402.663                                 |
| 250          | 3414.703                  | 3411.982                                 |

**§Table S9.** output file of *PASCa/* calculation for crystal **1** between 270 to 320 K.

| Output |                              |                                    | Direction |          |          |
|--------|------------------------------|------------------------------------|-----------|----------|----------|
| Axes   | $\alpha$ (MK <sup>-1</sup> ) | $\sigma\alpha$ (MK <sup>-1</sup> ) | <i>a</i>  | <i>b</i> | <i>c</i> |
| X1     | -75.5912                     | 8.5752                             | 0.9711    | 0.179    | 0.1576   |
| X2     | 56.2074                      | 4.1354                             | 0.7988    | -0.1392  | -0.5853  |
| X3     | 169.4957                     | 7.0788                             | -0.5274   | 0.7832   | -0.3293  |
| V      | 149.7008                     | 4.4276                             |           |          |          |

  

| % change in length |                           |                           |                           |                                |                                |                                |
|--------------------|---------------------------|---------------------------|---------------------------|--------------------------------|--------------------------------|--------------------------------|
| <i>T</i> (K)       | <i>X</i> <sub>1</sub> (%) | <i>X</i> <sub>2</sub> (%) | <i>X</i> <sub>3</sub> (%) | <i>X</i> <sub>1,calc</sub> (%) | <i>X</i> <sub>2,calc</sub> (%) | <i>X</i> <sub>3,calc</sub> (%) |
| 270                | 0                         | 0                         | 0                         | 0.0474                         | -0.0002                        | -0.0386                        |
| 280                | -0.0214                   | 0.0497                    | 0.126                     | -0.0282                        | 0.056                          | 0.1309                         |
| 290                | -0.0609                   | 0.1095                    | 0.2651                    | -0.1038                        | 0.1122                         | 0.3004                         |
| 300                | -0.1269                   | 0.1696                    | 0.4286                    | -0.1794                        | 0.1684                         | 0.4699                         |
| 310                | -0.2789                   | 0.2546                    | 0.655                     | -0.255                         | 0.2246                         | 0.6394                         |
| 320                | -0.3615                   | 0.2585                    | 0.8364                    | -0.3306                        | 0.2808                         | 0.8089                         |

  

| Volume       |                           |                                          |
|--------------|---------------------------|------------------------------------------|
| <i>T</i> / K | <i>V</i> / Å <sup>3</sup> | <i>V</i> <sub>lin</sub> / Å <sup>3</sup> |
| 270          | 6911.907                  | 6912.537                                 |
| 280          | 6922.57                   | 6922.884                                 |
| 290          | 6933.598                  | 6933.231                                 |
| 300          | 6944.486                  | 6943.579                                 |
| 310          | 6955.417                  | 6953.926                                 |
| 320          | 6962.451                  | 6964.273                                 |

## Reference

- 50 G. Steimecke, H.-J. Sieler, R. Kirmse and E. Hoyer, *Phosphorus and Sulfur and the Related Elements*, 1979, **7**, 49–55.
- 51 G. M. Sheldrick, *Acta Cryst A*, 2015, **71**, 3–8.
- 52 O. V. Dolomanov, L. J. Bourhis, R. J. Gildea, J. a. K. Howard and H. Puschmann, *J Appl Cryst*, 2009, **42**, 339–341.
- 53 G. A. Bain and J. F. Berry, *J. Chem. Educ.*, 2008, **85**, 532.
- 54 W. J. Hehre, R. Ditchfield and J. A. Pople, *The Journal of Chemical Physics*, 1972, **56**, 2257–2261.
- 55 A. D. Becke, *The Journal of Chemical Physics*, 1993, **98**, 5648–5652.
- 56 S. F. Boys and F. and Bernardi, *Molecular Physics*, 1970, **19**, 553–566.
- 57 M. Xu, Y. Song, Y. Xu, Q. Sun, F. Long, N. Shi, Y. Qiao, C. Zhou, Y. Ren and J. Chen, *Chem. Mater.*, 2022, **34**, 9437–9445.
- 58 C. Yu, K. Lin, S. Jiang, Y. Cao, W. Li, Y. Wang, Y. Chen, K. An, L. You, K. Kato, Q. Li, J. Chen, J. Deng and X. Xing, *Nat Commun*, 2021, **12**, 4701.
- 59 S. Li, R. Huang, Y. Zhao, W. Wang, Y. Han and L. Li, *Advanced Functional Materials*, 2017, **27**, 1604195.
- 60 Y. Song, J. Chen, X. Liu, C. Wang, J. Zhang, H. Liu, H. Zhu, L. Hu, K. Lin, S. Zhang and X. Xing, *J. Am. Chem. Soc.*, 2018, **140**, 602–605.
- 61 P. Hu, J. Chen, J. Deng and X. Xing, *J. Am. Chem. Soc.*, 2010, **132**, 1925–1928.
- 62 Y. Sun, Y. Cao, S. Hu, M. Avdeev, C.-W. Wang, S. Khmelevskiy, Y. Ren, S. H. Lapidus, X. Chen, Q. Li, J. Deng, J. Miao, K. Lin, X. Kuang and X. Xing, *J. Am. Chem. Soc.*, 2023, **145**, 17096–17102.
- 63 W. Wang, R. Huang, W. Li, J. Tan, Y. Zhao, S. Li, C. Huang and L. Li, *Phys. Chem. Chem. Phys.*, 2014, **17**, 2352–2356.
- 64 M. Xia, F. Liang, X. Meng, Y. Wang and Z. Lin, *Inorg. Chem. Front.*, 2019, **6**, 2291–2295.
- 65 T. Matsuda, H. Tokoro, K. Hashimoto and S. Ohkoshi, *Dalton Trans.*, 2006, 5046–5050.
- 66 Z. Liu, K. Lin, Y. Ren, K. Kato, Y. Cao, J. Deng, J. Chen and X. Xing, *Chem. Commun.*, 2019, **55**, 4107–4110.
